# Supplementary material for: Speckle-Tracking and Tissue-Doppler Stress Echocardiography in Arterial Hypertension: A Sensitive Tool for Detection of Subclinical LV Impairment
Source: Hindawi journal article supplement (doi:10.1155/2014/472562), 2014-01-01
Supplement: f1 [file 472562.f1.pdf]

|                                                    | <b>Hypertensive</b><br>(n=46) | <b>p-value</b> | <b>Control</b><br>(n=46) | <b>p-value</b> |
|----------------------------------------------------|-------------------------------|----------------|--------------------------|----------------|
| <b>Global circumferential strain</b>               |                               |                |                          |                |
| <b>Low - rest</b>                                  | -0.5 SD 4.1                   | NS             | -0.9 SD 4.5              | NS             |
| <b>High - rest</b>                                 | -0.8 SD 4.5                   | NS             | -1.6 SD 4.1              | 0.007          |
| <b>Global longitudinal strain (2-chamber view)</b> |                               |                |                          |                |
| <b>Low - rest</b>                                  | -0.8 SD 3.4                   | NS             | -0.8 SD 3.3              | NS             |
| <b>High - rest</b>                                 | -1.1 SD 3.5                   | 0.029          | -1.3 SD 3.2              | 0.014          |
| <b>Global longitudinal strain (3-chamber view)</b> |                               |                |                          |                |
| <b>Low - rest</b>                                  | -0.6 SD 4.7                   | NS             | -2.0 SD 3.2              | <0.001         |
| <b>High - rest</b>                                 | -1.3 SD 4.0                   | NS             | -2.6 SD 3.0              | <0.001         |
| <b>Global longitudinal strain (4-chamber view)</b> |                               |                |                          |                |
| <b>Low - rest</b>                                  | -0.9 SD 3.1                   | 0.041          | -1.5 SD 3.7              | 0.022          |
| <b>High - rest</b>                                 | -1.4 SD 3.2                   | 0.005          | -2.4 SD 4.1              | <0.001         |

**Supplementary table 1.** Tissue-Doppler: Difference in peak LV strain at rest and during stress echocardiography

|                                                    | <b>Hypertensive</b><br>(n=46) | <b>p-value</b> | <b>Control</b><br>(n=46) | <b>p-value</b> |
|----------------------------------------------------|-------------------------------|----------------|--------------------------|----------------|
| <b>Global circumferential strain</b>               |                               |                |                          |                |
| <b>Low - rest</b>                                  | -0.3 SD 5.2                   | NS             | -1.2 SD 4.6              | NS             |
| <b>High - rest</b>                                 | -1.0 SD 4.5                   | NS             | -2.4 SD 4.8              | 0.003          |
| <b>Global longitudinal strain (2-chamber view)</b> |                               |                |                          |                |
| <b>Low - rest</b>                                  | -1.7 SD 4.8                   | 0.017          | -1.3 SD 5.1              | NS             |
| <b>High - rest</b>                                 | -0.9 SD 5.4                   | NS             | -1.4 SD 5.6              | NS             |
| <b>Global longitudinal strain (3-chamber view)</b> |                               |                |                          |                |
| <b>Low - rest</b>                                  | -1.5 SD 4.3                   | 0.016          | -1.1 SD 4.1              | 0.042          |
| <b>High - rest</b>                                 | -1.2 SD 4.2                   | NS             | -1.3 SD 5.0              | 0.037          |
| <b>Global longitudinal strain (4-chamber view)</b> |                               |                |                          |                |
| <b>Low - rest</b>                                  | -1.2 SD 4.0                   | 0.021          | -1.4 SD 4.0              | 0.012          |
| <b>High - rest</b>                                 | -1.6 SD 3.9                   | 0.012          | -1.2 SD 4.7              | NS             |

**Supplementary table 2.** Speckle-tracking: Difference in peak LV strain at rest and during stress echocardiography
